# Supplementary material for: Predictors of perceived risk in first-degree relatives of patients with rheumatoid arthritis
Source: PubMed Central journal article supplement (PMC9723950; doi:10.1136/rmdopen-2022-002606), 2022-12-05
Supplement: rmdopen-2022-002606supp001.pdf [file rmdopen-2022-002606supp001.pdf]

## Supplementary Materials

**Figure 1:** Scatterplots and Spearman Correlations for Risk Measures

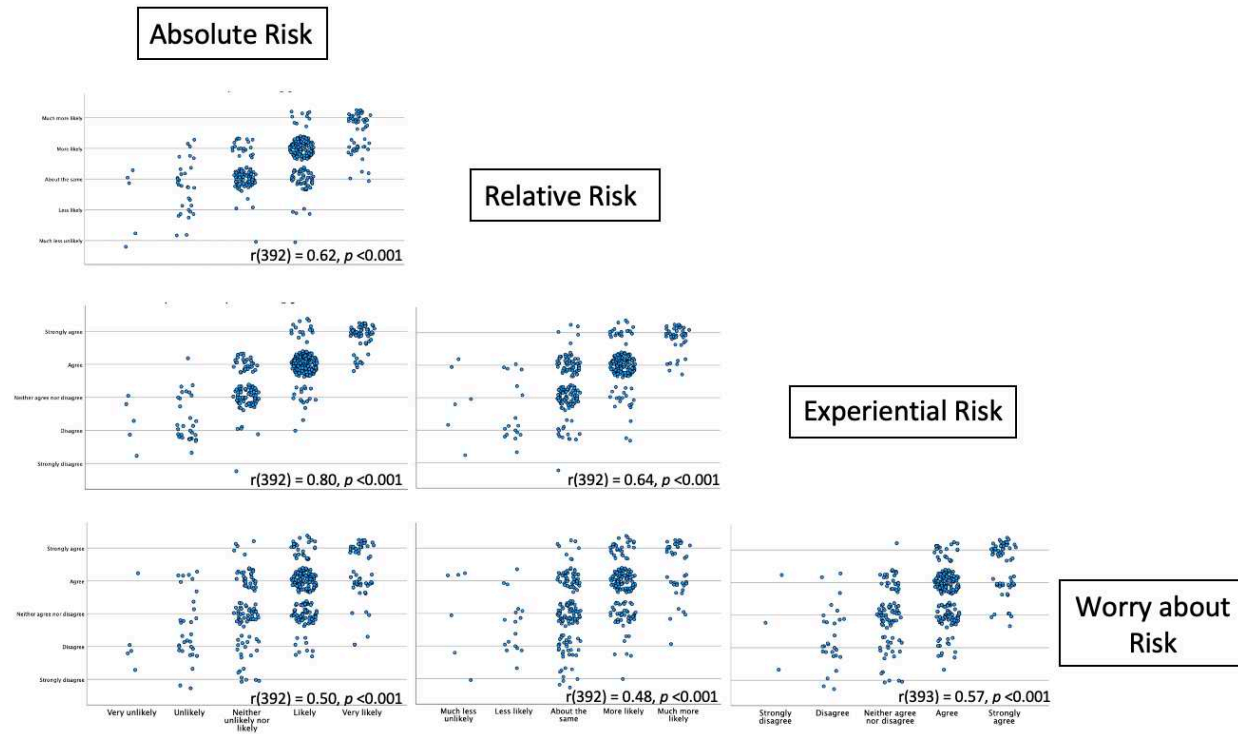

**Table 1:** Sensitivity analysis (children only) – Univariate Analysis

| Characteristic of FDR                                       | All Children<br>(n=295) | Sensitivity Analysis – Children Only |                 |         |                         |                 |         |                             |                 |         |                  |                 |         |
|-------------------------------------------------------------|-------------------------|--------------------------------------|-----------------|---------|-------------------------|-----------------|---------|-----------------------------|-----------------|---------|------------------|-----------------|---------|
|                                                             |                         | Perceived Absolute Risk              |                 |         | Perceived Relative Risk |                 |         | Perceived Experiential Risk |                 |         | Worry about Risk |                 |         |
|                                                             |                         | Low<br>(n=86)                        | High<br>(n=208) | p-value | Low<br>(n=113)          | High<br>(n=181) | p-value | Low<br>(n=72)               | High<br>(n=223) | p-value | Low<br>(n=115)   | High<br>(n=180) | p-value |
| <b>Age (years)</b><br>n = 16 missing<br>Mean (SD); T        | 38.1 (11.8)             | 37.1 (11.9)                          | 38.6 (11.8)     | 0.34    | 37.5 (12.8)             | 38.6 (11.3)     | 0.46    | 37.7 (12.1)                 | 38.3 (11.3)     | 0.73    | 37.4 (12.0)      | 38.6 (11.7)     | 0.42    |
| <b>Gender</b>                                               |                         |                                      |                 |         |                         |                 |         |                             |                 |         |                  |                 |         |
| Male                                                        | 107 (36.9)              | 34 (31.8)                            | 73 (68.2)       | 0.50    | 47 (43.9)               | 60 (56.1)       | 0.14    | 32 (29.9)                   | 75 (70.1)       | 0.10    | 56 (52.3)        | 51 (47.7)       | <0.001* |
| Female                                                      | 183 (63.1)              | 51 (28.0)                            | 131 (72.0)      |         | 64 (35.2)               | 118 (64.8)      |         | 39 (21.3)                   | 144 (78.7)      |         | 57 (31.1)        | 126 (68.9)      |         |
| n = 6 missing<br>Frequency (%); CS                          |                         |                                      |                 |         |                         |                 |         |                             |                 |         |                  |                 |         |
| <b>Ethnic Group</b>                                         |                         |                                      |                 |         |                         |                 |         |                             |                 |         |                  |                 |         |
| White                                                       | 241 (82.3)              | 68 (28.2)                            | 173 (71.8)      | 0.25    | 94 (39.0)               | 147 (61.0)      | 0.77    | 58 (24.1)                   | 183 (75.9)      | 0.93    | 94 (39.0)        | 147 (61.0)      | 0.47    |
| Asian                                                       | 27 (9.2)                | 9 (33.3)                             | 18 (66.7)       |         | 8 (29.6)                | 19 (70.4)       |         | 7 (25.9)                    | 20 (74.1)       |         | 8 (29.4)         | 19 (70.4)       |         |
| Black                                                       | 12 (4.1)                | 1 (9.1)                              | 10 (90.9)       |         | 5 (45.5)                | 6 (54.5)        |         | 3 (25.0)                    | 9 (75.0)        |         | 7 (58.3)         | 5 (41.7)        |         |
| Mixed                                                       | 12 (4.1)                | 6 (50.0)                             | 6 (50.0)        |         | 5 (41.7)                | 7 (58.3)        |         | 4 (33.3)                    | 8 (66.7)        |         | 5 (41.7)         | 7 (58.3)        |         |
| Other                                                       | 1 (0.3)                 | 0 (0.0)                              | 1 (100.0)       |         | 0 (0.0)                 | 1 (100.0)       |         | 0 (0.0)                     | 1 (100.0)       |         | 0 (0.0)          | 1 (100.0)       |         |
| n=2 missing<br>Frequency (%); CS                            |                         |                                      |                 |         |                         |                 |         |                             |                 |         |                  |                 |         |
| <b>Deprivation Index</b><br>n=82 missing<br>Median (IQR); U | 4 (2-7)                 | 5 (2-7)                              | 4 (2-7)         | 0.33    | 4 (2-7)                 | 4.5 (2-7)       | 0.45    | 6 (3-7.5)                   | 4 (2-7)         | 0.15    | 5 (2-7)          | 4 (2-7)         | 0.35    |
| <b>Employment Status</b>                                    |                         |                                      |                 |         |                         |                 |         |                             |                 |         |                  |                 |         |
| Employed                                                    | 240 (82.9)              | 75 (31.3)                            | 165 (68.8)      | 0.22    | 98 (40.8)               | 142 (59.2)      | 0.24    | 60 (25.0)                   | 180 (75.0)      | 0.32    | 96 (40.0)        | 144 (60.0)      | 0.14    |
| Unemployed                                                  | 22 (7.6)                | 3 (13.6)                             | 19 (86.4)       |         | 5 (22.7)                | 17 (77.3)       |         | 3 (13.6)                    | 19 (86.4)       |         | 5 (22.7)         | 17 (77.3)       |         |
| Other                                                       | 28 (9.7)                | 8 (29.6)                             | 19 (70.4)       |         | 10 (37.0)               | 17 (63.0)       |         | 9 (32.1)                    | 19 (67.9)       |         | 14 (50.0)        | 14 (50.0)       |         |
| n=6 missing<br>Frequency (%); CS                            |                         |                                      |                 |         |                         |                 |         |                             |                 |         |                  |                 |         |
| <b>Education Level</b>                                      |                         |                                      |                 |         |                         |                 |         |                             |                 |         |                  |                 |         |
| A-level or lower                                            | 134 (47.2)              | 40 (30.1)                            | 93 (69.9)       | 0.99    | 52 (39.1)               | 81 (60.9)       | 0.88    | 39 (29.1)                   | 95 (70.9)       | 0.17    | 48 (35.8)        | 86 (64.2)       | 0.20    |
| Higher than A-level                                         | 150 (52.8)              | 45 (30.0)                            | 105 (70.0)      |         | 60 (40.0)               | 90 (60.0)       |         | 33 (22.0)                   | 117 (78.0)      |         | 65 (43.3)        | 85 (56.7)       |         |
| n=17 missing<br>Frequency (%); CS                           |                         |                                      |                 |         |                         |                 |         |                             |                 |         |                  |                 |         |
| <b>Smoking Status</b>                                       |                         |                                      |                 |         |                         |                 |         |                             |                 |         |                  |                 |         |
| Current smoker                                              | 34 (11.8)               | 9 (26.5)                             | 25 (73.5)       | 0.74    | 10 (29.4)               | 24 (70.6)       | 0.39    | 9 (26.5)                    | 25 (73.5)       | 0.92    | 13 (38.2)        | 21 (61.8)       | 0.57    |
| Ex-smoker                                                   | 80 (27.8)               | 22 (27.8)                            | 57 (72.2)       |         | 34 (43.0)               | 45 (57.0)       |         | 21 (26.3)                   | 59 (73.8)       |         | 28 (35.0)        | 52 (65.0)       |         |
| Never smoked                                                | 174 (60.4)              | 55 (31.6)                            | 119 (68.4)      |         | 69 (39.7)               | 105 (60.3)      |         | 42 (24.1)                   | 132 (75.9)      |         | 73 (42.0)        | 101 (58.0)      |         |
| n=8 missing<br>Frequency (%); CS                            |                         |                                      |                 |         |                         |                 |         |                             |                 |         |                  |                 |         |
| <b>Relationship to index patient</b>                        |                         |                                      |                 |         |                         |                 |         |                             |                 |         |                  |                 |         |
| Child                                                       | 295 (100.0)             | 86 (29.3)                            | 208 (70.7)      | -       | 113 (38.4)              | 181 (61.6)      | -       | 72 (24.4)                   | 223 (75.6)      | -       | 115 (39.0)       | 180 (61.0)      | -       |
| Sibling                                                     | -                       | -                                    | -               |         | -                       | -               |         | -                           | -               |         | -                | -               |         |
| n=4 missing<br>Frequency (%); CS                            |                         |                                      |                 |         |                         |                 |         |                             |                 |         |                  |                 |         |
| <b>Living in same household as index patient</b>            |                         |                                      |                 |         |                         |                 |         |                             |                 |         |                  |                 |         |

|                                                      |            |                |            |               |            |              |               |             |            |                   |            |              |                   |
|------------------------------------------------------|------------|----------------|------------|---------------|------------|--------------|---------------|-------------|------------|-------------------|------------|--------------|-------------------|
| Yes                                                  | 73 (24.8)  | 24 (32.9)      | 49 (67.1)  | 0.40          | 35 (47.9)  | 38 (52.1)    | 0.05          | 19 (26.0)   | 54 (74.0)  | 0.67              | 34 (46.6)  | 39 (53.4)    | 0.12              |
| No                                                   | 221 (75.2) | 61 (27.7)      | 159 (72.3) |               | 77 (35.0)  | 143 (65.0)   |               | 52 (23.5)   | 169 (76.5) |                   | 80 (36.2)  | 141 (63.8)   |                   |
| <i>n=2 missing</i>                                   |            |                |            |               |            |              |               |             |            |                   |            |              |                   |
| <i>Frequency (%): CS</i>                             |            |                |            |               |            |              |               |             |            |                   |            |              |                   |
| <b>Frequency of communication with index patient</b> |            |                |            |               |            |              |               |             |            |                   |            |              |                   |
| Never                                                | 0 (0.0)    | 0 (0.0)        | 0 (0.0)    | 0.39          | 0 (0.0)    | 0 (0.0)      | 0.72          | 0 (0.0)     | 0 (0.0)    | 0.82              | 0 (0.0)    | 0 (0.0)      | 0.06              |
| Rarely                                               | 0 (0.0)    | 0 (0.0)        | 0 (0.0)    |               | 0 (0.0)    | 0 (0.0)      |               | 0 (0.0)     | 0 (0.0)    |                   | 0 (0.0)    | 0 (0.0)      |                   |
| Sometimes                                            | 8 (2.7)    | 4 (50.0)       | 4 (50.0)   |               | 3 (37.5)   | 5 (62.5)     |               | 2 (25.0)    | 6 (75.0)   |                   | 4 (50.0)   | 4 (50.0)     |                   |
| Often                                                | 96 (32.8)  | 26 (27.1)      | 70 (72.9)  |               | 40 (41.7)  | 56 (58.3)    |               | 24 (25.0)   | 72 (75.0)  |                   | 44 (45.6)  | 52 (54.2)    |                   |
| Daily                                                | 189 (64.5) | 55 (29.3)      | 133 (70.7) |               | 69 (36.7)  | 119 (63.3)   |               | 45 (23.8)   | 144 (76.2) |                   | 66 (34.9)  | 123 (65.1)   |                   |
| <i>n=4 missing</i>                                   |            |                |            |               |            |              |               |             |            |                   |            |              |                   |
| <i>Frequency (%): U</i>                              |            |                |            |               |            |              |               |             |            |                   |            |              |                   |
| <b>Subjective Numeracy</b>                           | 15 (12-17) | 15 (13 - 17.5) | 15 (12-18) | 0.30          | 15 (12-17) | 15 (12-18)   | 0.66          | 15 (13-17)  | 15 (12-18) | 0.41              | 16 (13-18) | 14 (11-17.5) | <b>0.01*</b>      |
| <i>n=4 missing</i>                                   |            |                |            |               |            |              |               |             |            |                   |            |              |                   |
| <i>Median (IQR): U</i>                               |            |                |            |               |            |              |               |             |            |                   |            |              |                   |
| <b>Health Literacy</b>                               | 0 (0-0)    | 0 (0-0)        | 0 (0-0)    | <b>0.01*</b>  | 0 (0-0)    | 0 (0-0)      | 0.11          | 0 (0-0)     | 0 (0-0)    | <b>0.007*</b>     | 0 (0-0)    | 0 (0-0)      | 0.92              |
| <i>n=4 missing</i>                                   |            |                |            |               |            |              |               |             |            |                   |            |              |                   |
| <i>Median (IQR): U</i>                               |            |                |            |               |            |              |               |             |            |                   |            |              |                   |
| <b>Illness Perceptions</b>                           |            |                |            |               |            |              |               |             |            |                   |            |              |                   |
| Consequences<br><i>(n=4 missing)</i>                 | 9 (7-9)    | 8 (7-9)        | 8 (7-9)    | 0.35          | 8 (7-9)    | 8 (7-9)      | 0.18          | 8 (7-9)     | 8 (7-9)    | 0.09              | 7 (6-8)    | 8 (7-9)      | <b>&lt;0.001*</b> |
| Timeline<br><i>(n=5 missing)</i>                     | 10 (9-10)  | 10 (8-10)      | 10 (9-10)  | 0.09          | 10 (8-10)  | 10 (9.25-10) | <b>0.002*</b> | 10 (8-10)   | 10 (9-10)  | 0.05              | 10 (8-10)  | 10 (9-10)    | <b>0.008*</b>     |
| Personal control<br><i>(n=5 missing)</i>             | 5 (3-6)    | 5 (3-6)        | 5 (3-6)    | 0.90          | 5 (3-6)    | 5 (3-6)      | 0.71          | 5 (3-6)     | 5 (3-6)    | 0.64              | 5 (3-6)    | 5 (3-6)      | 0.45              |
| Treatment control<br><i>(n=5 missing)</i>            | 7 (5-7)    | 7 (5-8)        | 6 (5-8)    | <b>0.03*</b>  | 7 (5-8)    | 6 (5-7)      | <b>0.02*</b>  | 7 (5-8.5)   | 6 (5-8)    | <b>0.03*</b>      | 7 (5-8)    | 6 (5-7)      | <b>0.001*</b>     |
| Identity<br><i>(n= 4 missing)</i>                    | 8 (7-8)    | 8 (6.5-8)      | 7 (7-8)    | 0.41          | 7 (6-8)    | 8 (7-8)      | 0.07          | 8 (6-8)     | 7 (7-8)    | 0.26              | 7 (6-8)    | 8 (7-8.5)    | <b>&lt;0.001*</b> |
| Concern<br><i>(n=2 missing)</i>                      | 8 (7-10)   | 8 (7-10)       | 8 (7-10)   | 0.16          | 8 (7-10)   | 8 (7-10)     | 0.17          | 8 (7-10)    | 8 (7-10)   | 0.09              | 8 (6-8)    | 9 (8-10)     | <b>&lt;0.001*</b> |
| Understanding<br><i>(n=2 missing)</i>                | 7 (6-9)    | 7 (6-9)        | 7 (6-9)    | 0.36          | 7 (6-9)    | 7 (6-9)      | 0.45          | 7 (6-9)     | 7 (6-9)    | 0.42              | 8 (6-9)    | 7 (6-9)      | 0.27              |
| Emotion<br><i>(n=2 missing)</i>                      | 7 (6-9)    | 7 (6-9)        | 7 (6-9)    | 0.61          | 7 (6-9)    | 7 (6-9)      | 0.23          | 7 (5-8)     | 7 (6-9)    | <b>0.01*</b>      | 7 (5-7)    | 8 (7-9)      | <b>&lt;0.001*</b> |
| <i>Median (IQR): U</i>                               |            |                |            |               |            |              |               |             |            |                   |            |              |                   |
| <b>Coping Style</b><br><i>n = 8 missing</i>          | 29.8 (5.7) | 29.4 (5.9)     | 29.9 (5.9) | 0.58          | 29.7 (5.9) | 29.8 (5.6)   | 0.89          | 30.0 (6.1)  | 29.7 (5.6) | 0.73              | 29.8 (6.2) | 29.7 (5.4)   | 0.93              |
| <i>Mean (SD): T</i>                                  |            |                |            |               |            |              |               |             |            |                   |            |              |                   |
| <b>Optimism</b><br><i>n = 5 missing</i>              | 7.1 (2.4)  | 7.1 (2.5)      | 7.2 (2.4)  | 0.86          | 7.3 (2.6)  | 7.1 (2.3)    | 0.48          | 7.3 (2.4)   | 7.1 (2.4)  | 0.62              | 7.1 (2.8)  | 7.2 (2.3)    | 0.71              |
| <i>Mean (SD): T</i>                                  |            |                |            |               |            |              |               |             |            |                   |            |              |                   |
| <b>Health Anxiety</b><br><i>n = 17 missing</i>       | 12 (8-18)  | 11 (7-15)      | 13 (8-19)  | <b>0.046*</b> | 11 (7-16)  | 13 (9-19)    | <b>0.001*</b> | 11 (6-13.5) | 13 (9-19)  | <b>&lt;0.001*</b> | 9 (6-14)   | 14 (9-20)    | <b>&lt;0.001*</b> |
| <i>Median (IQR): U</i>                               |            |                |            |               |            |              |               |             |            |                   |            |              |                   |

T = Independent samples T-test, CS = Chi-Square test, U = Mann-Whitney U Test

**Table 2:** Sensitivity Analysis (children only) - Index Patient Descriptive Statistics and GEEs (Relative Risk, Experiential Risk, Worry about Risk)

| Characteristic of Index Patient                           | All Patients<br>(n=162 patients) | GEEs – Sensitivity Analysis – Children Only |                         |      |         |                         |                         |      |         |                             |                         |      |              |                       |                         |      |         |
|-----------------------------------------------------------|----------------------------------|---------------------------------------------|-------------------------|------|---------|-------------------------|-------------------------|------|---------|-----------------------------|-------------------------|------|--------------|-----------------------|-------------------------|------|---------|
|                                                           |                                  | Perceived Absolute Risk                     |                         |      |         | Perceived Relative Risk |                         |      |         | Perceived Experiential Risk |                         |      |              | Worry about Risk      |                         |      |         |
|                                                           |                                  | Low<br>(n=74<br>FDRs)                       | High<br>(n=107<br>FDRs) | WCS  | P-value | Low<br>(n=90<br>FDRs)   | High<br>(n=131<br>FDRs) | WCS  | P-value | Low<br>(n=60<br>FDRs)       | High<br>(n=162<br>FDRs) | WCS  | P-value      | Low<br>(n=96<br>FDRs) | High<br>(n=126<br>FDRs) | WCS  | P-value |
| <b>Age (years)</b><br>n = 7 missing<br>Median (IQR)       | 65 (57.25-75)                    | 64 (57.5-70.5)                              | 66 (58.5-75.0)          | 2.40 | 0.12    | 64 (57.5-70.5)          | 66 (58.5-75.0)          | 1.58 | 0.21    | 64 (54.75-70)               | 65 (58.5-75.0)          | 4.41 | <b>0.04*</b> | 64 (57.5-75)          | 65 (59-74.25)           | 0.13 | 0.71    |
| <b>Gender</b>                                             |                                  |                                             |                         |      |         |                         |                         |      |         |                             |                         |      |              |                       |                         |      |         |
| Male                                                      | 40 (24.7)                        | 13 (24.5)                                   | 40 (75.5)               | 2.27 | 0.13    | 13 (24.5)               | 40 (75.5)               | 0.03 | 0.88    | 11 (20.8)                   | 42 (79.2)               | 1.13 | 0.29         | 25 (47.2)             | 28 (52.8)               | 0.26 | 0.61    |
| Female                                                    | 117 (72.2)                       | 59 (36.2)                                   | 104 (63.8)              |      |         | 59 (36.2)               | 104 (63.8)              |      |         | 47 (28.7)                   | 117 (71.3)              |      |              | 69 (42.1)             | 95 (57.9)               |      |         |
| n = 6 missing<br>Frequency (%)                            |                                  |                                             |                         |      |         |                         |                         |      |         |                             |                         |      |              |                       |                         |      |         |
| <b>Age at diagnosis</b><br>n = 47 missing<br>Median (IQR) | 54 (43.5-62)                     | 50 (41.5-60.0)                              | 54 (47-63)              | 3.76 | 0.05    | 50 (41.5-60.0)          | 54 (43-63)              | 0.18 | 0.67    | 50 (43-58.5)                | 54 (46-63)              | 4.26 | <b>0.04*</b> | 53 (44.5-62.5)        | 54 (43-61)              | 0.45 | 0.51    |
| <b>RA Treatment</b>                                       |                                  |                                             |                         |      |         |                         |                         |      |         |                             |                         |      |              |                       |                         |      |         |
| Biologic                                                  | 47 (29.0)                        | 20 (31.3)                                   | 44 (68.8)               | 0.17 | 0.68    | 20 (31.3)               | 44 (68.8)               | 0.42 | 0.52    | 17 (26.6)                   | 47 (73.4)               | 0.01 | 0.94         | 31 (48.4)             | 33 (51.6)               | 0.64 | 0.43    |
| Non-Biologic                                              | 115(71.0)                        | 54 (34.4)                                   | 103 (65.6)              |      |         | 54 (34.4)               | 103 (65.6)              |      |         | 43 (27.2)                   | 115 (72.8)              |      |              | 65 (41.1)             | 93 (58.9)               |      |         |
| n = 0 missing<br>Frequency (%)                            |                                  |                                             |                         |      |         |                         |                         |      |         |                             |                         |      |              |                       |                         |      |         |

GEE = Generalised Estimating Equation, WCS = Wald Chi-Square
